# Supplementary material
Source: ML conference proceedings conference paper supplement (https://openreview.net/forum?id=5M5WdH659Y)

# Superpoint Transformer

*Efficient learning on large scale 3D point clouds*

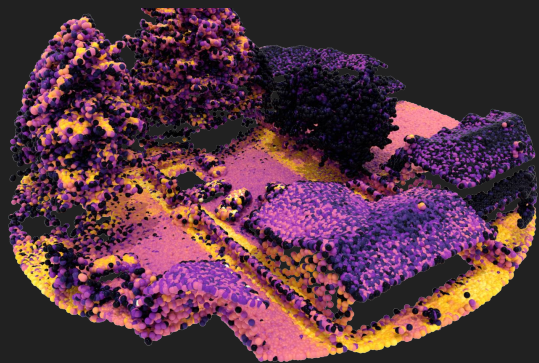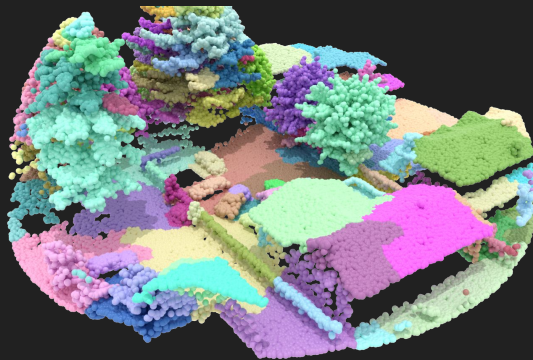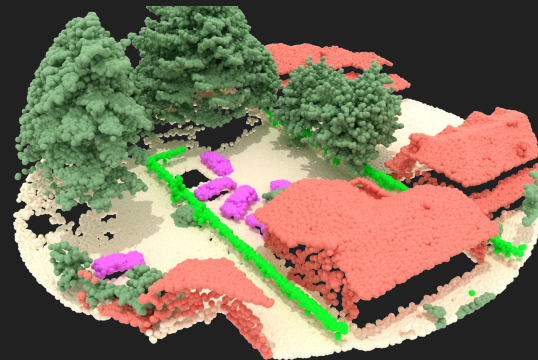

# About me

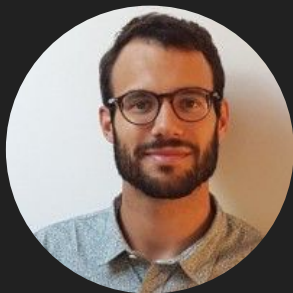

**Damien Robert**

University of Zurich, DM3L, EcoVision lab

 /drprojects • [drprojects.github.io](https://drprojects.github.io) • [damien.robert@uzh.ch](mailto:damien.robert@uzh.ch)

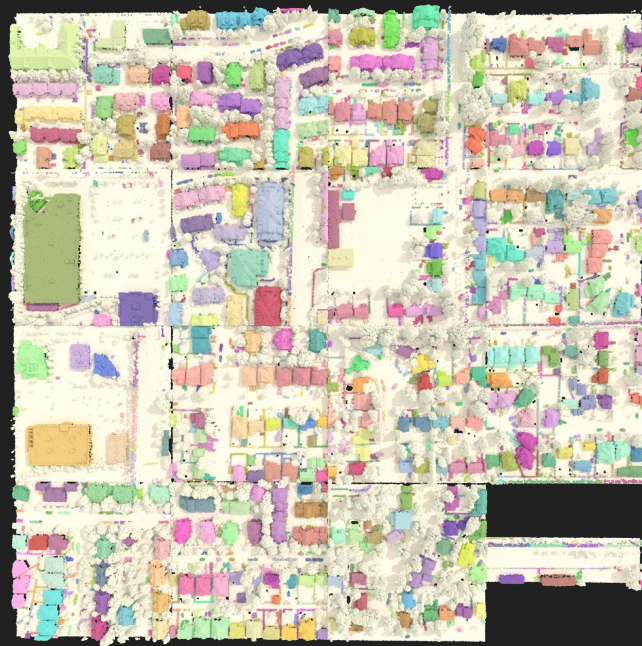

*Efficient learning on large scale 3D point clouds*

PhD at [IGN LASTIG](#) & [ENGIE CRIGEN](#) labs

# 3D scene semantic understanding

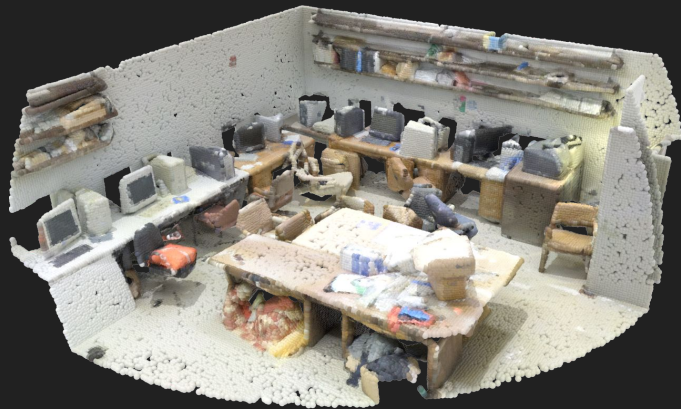

Input

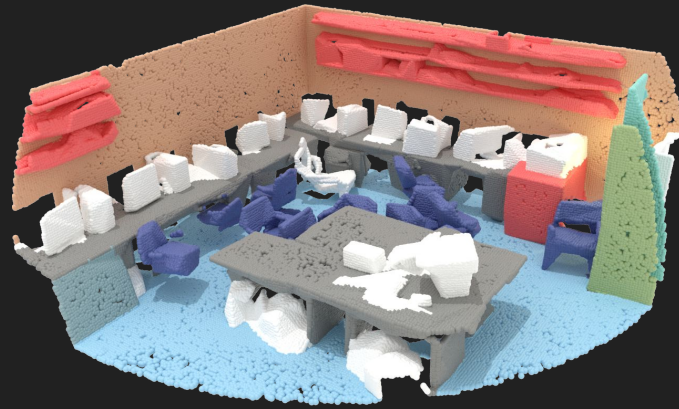

Target

**Large-scale** 3D point clouds of **+10M points**

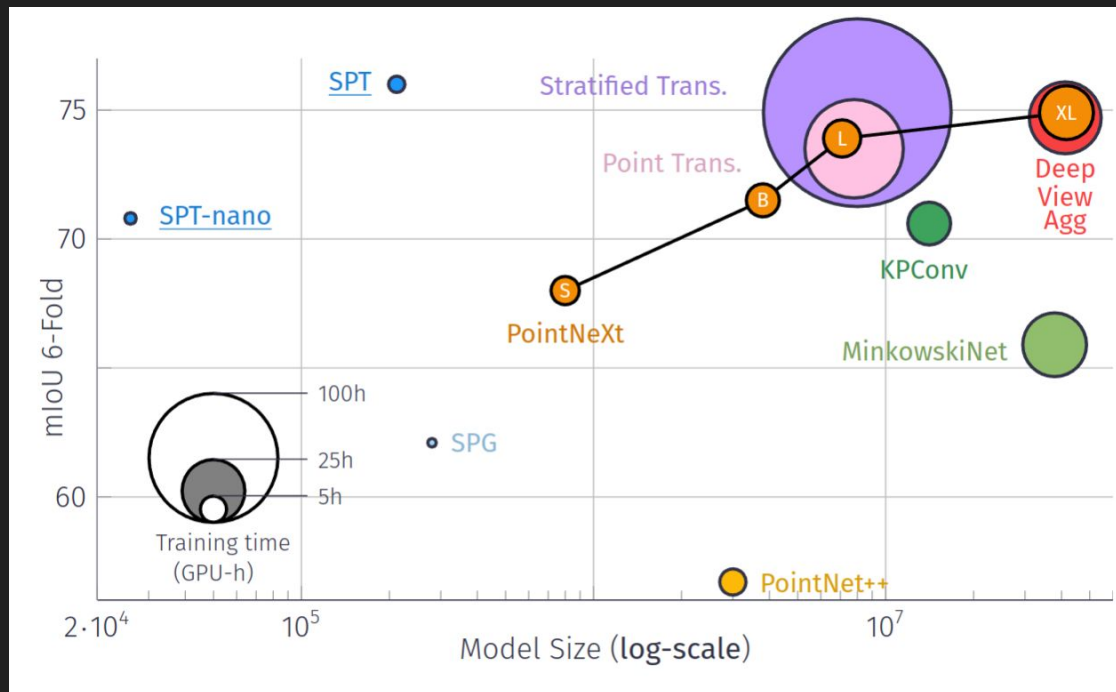

Model Size vs. Performance on S3DIS 6-Fold

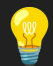

# Motivation

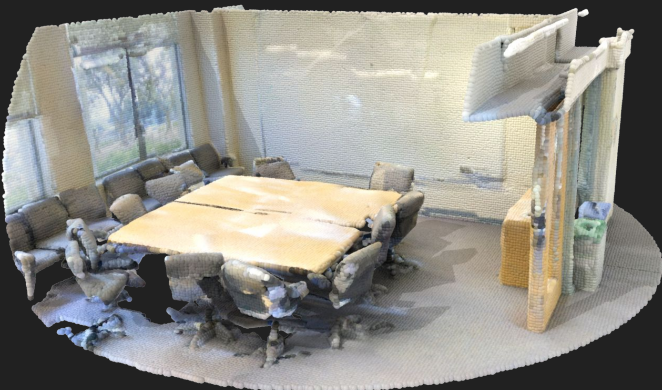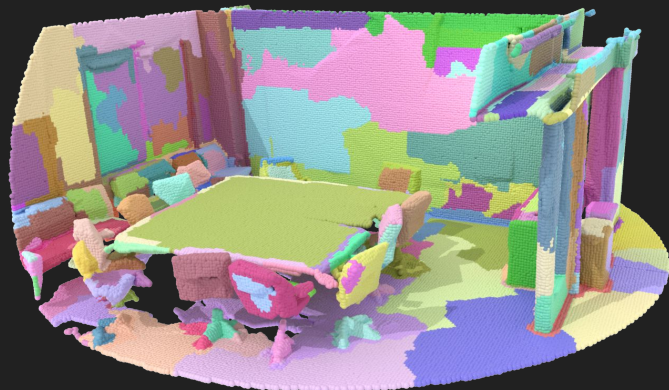

✚ Partition point cloud into semantically-homogeneous **superpoints**





# Motivation



✚ Partition point cloud into semantically-homogeneous **superpoints**

Learn to **classify** the superpoints



# Motivation



✚ **Partition** point cloud into semantically-homogeneous **superpoints**

Learn to **classify** the superpoints

✚ **Geometry-guided** compute effort allocation

# Pipeline - Preprocessing

✨ RAW

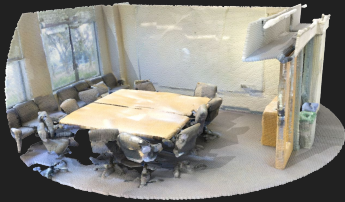



# Pipeline - Preprocessing

✨ RAW

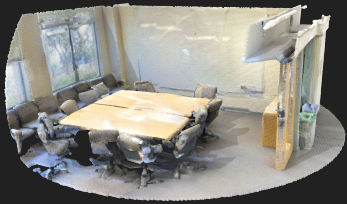

 tiling

# Pipeline - Preprocessing

$P_0$

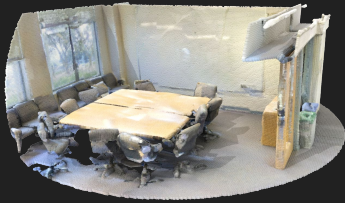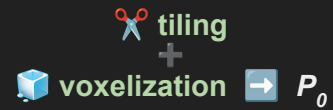

# Pipeline - Preprocessing

$P_0$

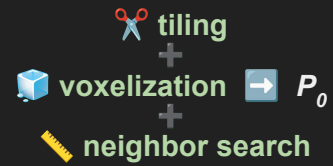

# Pipeline - Preprocessing

$P_0$

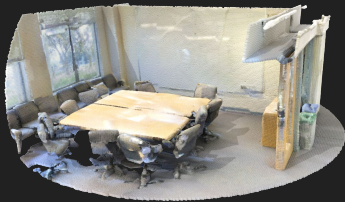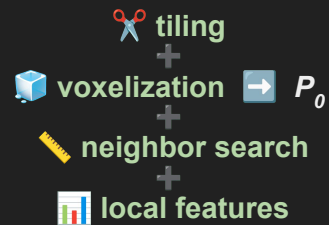

# Pipeline - Preprocessing

$P_0$

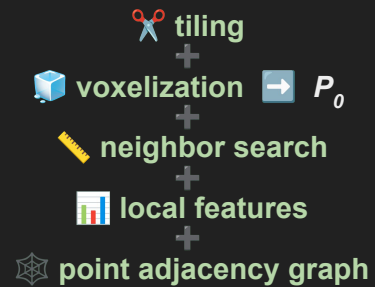



# Pipeline - Preprocessing

$P_0$

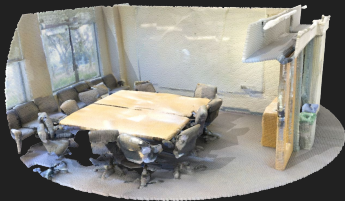

$P_1$

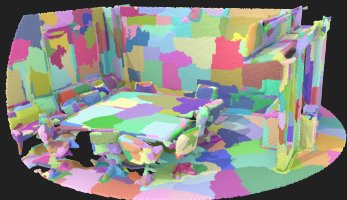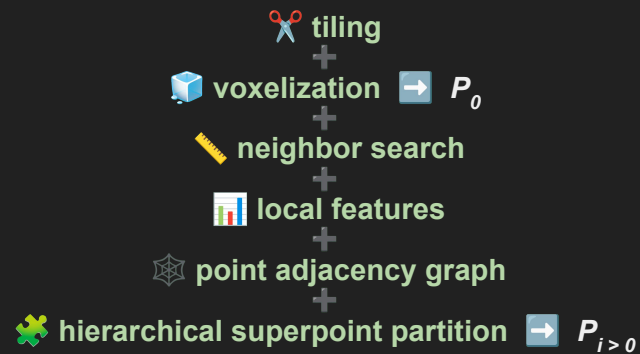

# Pipeline - Preprocessing

$P_0$



$P_1$

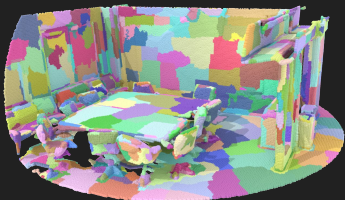

$P_2$

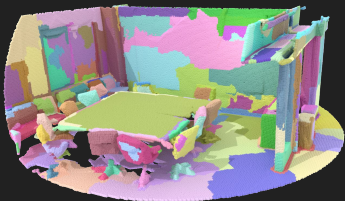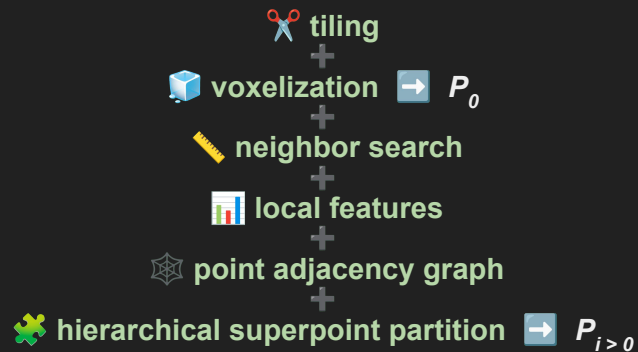

# Pipeline - Preprocessing

$P_0$

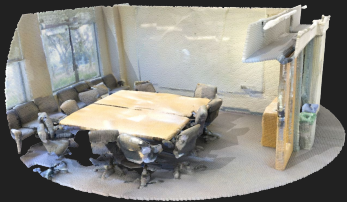

$P_1$

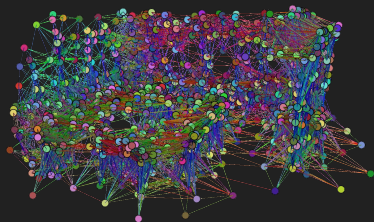

$P_2$

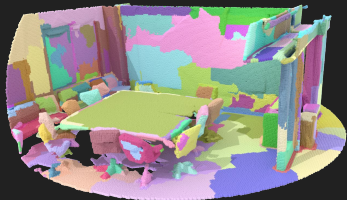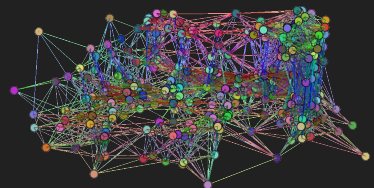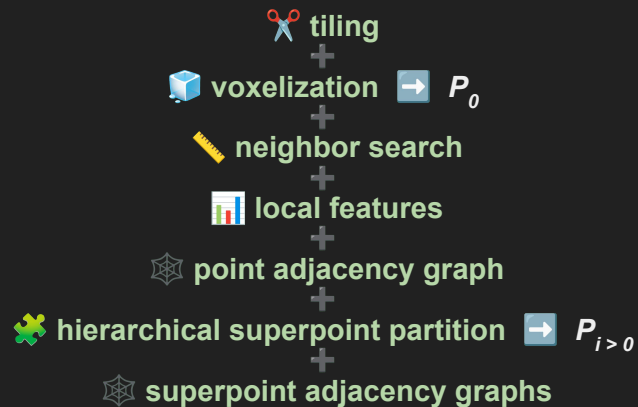

# Pipeline - Training

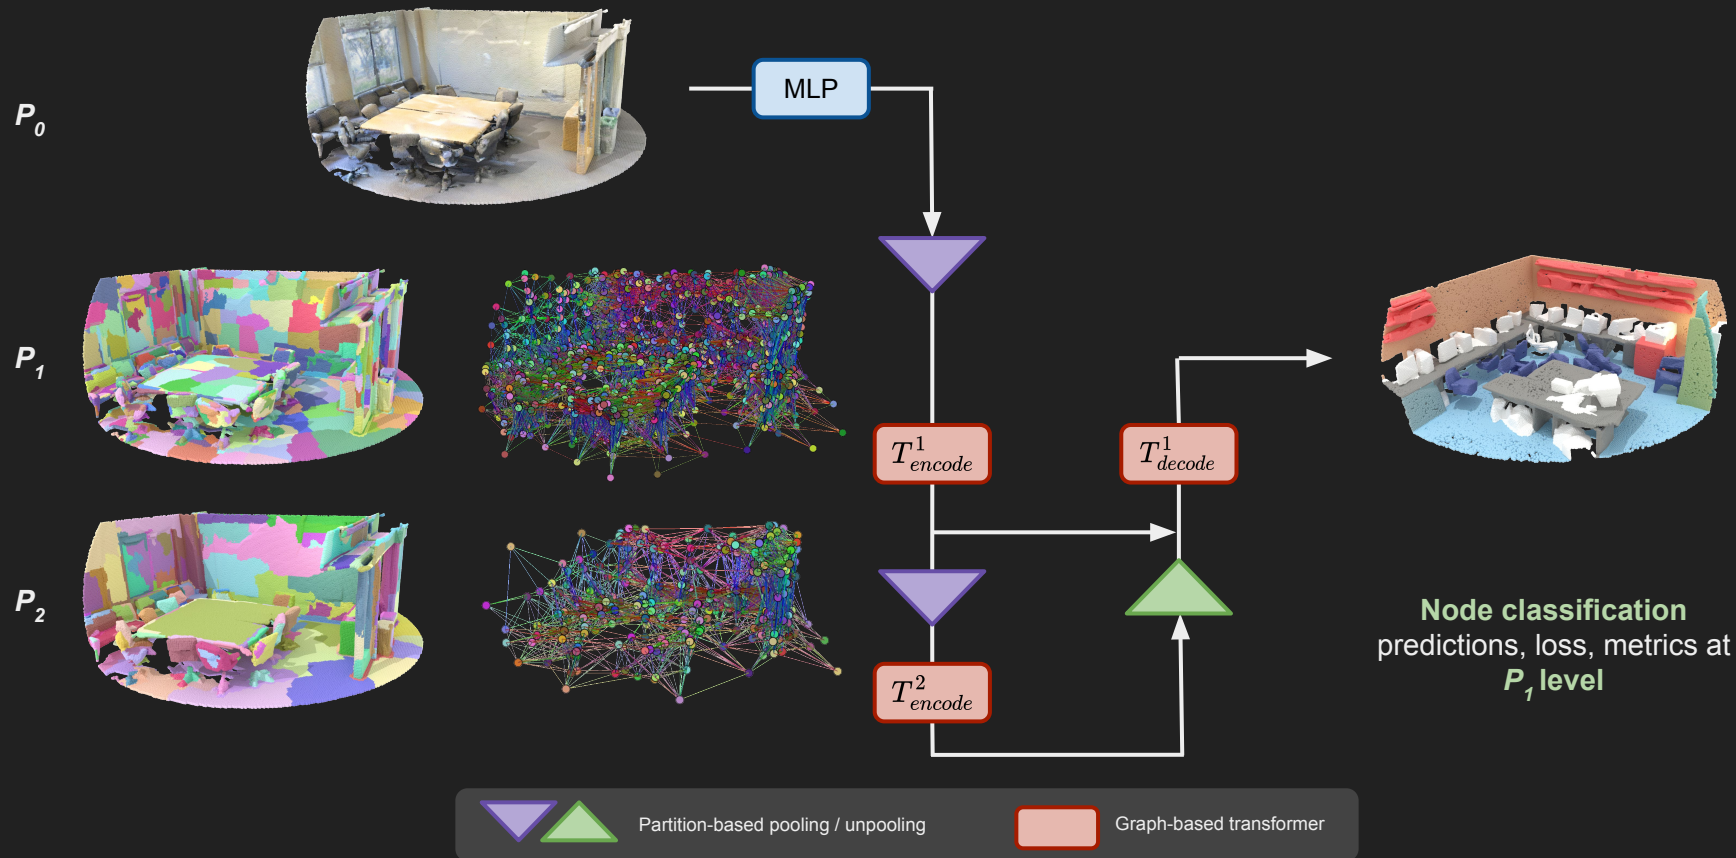

# Pipeline - Inference

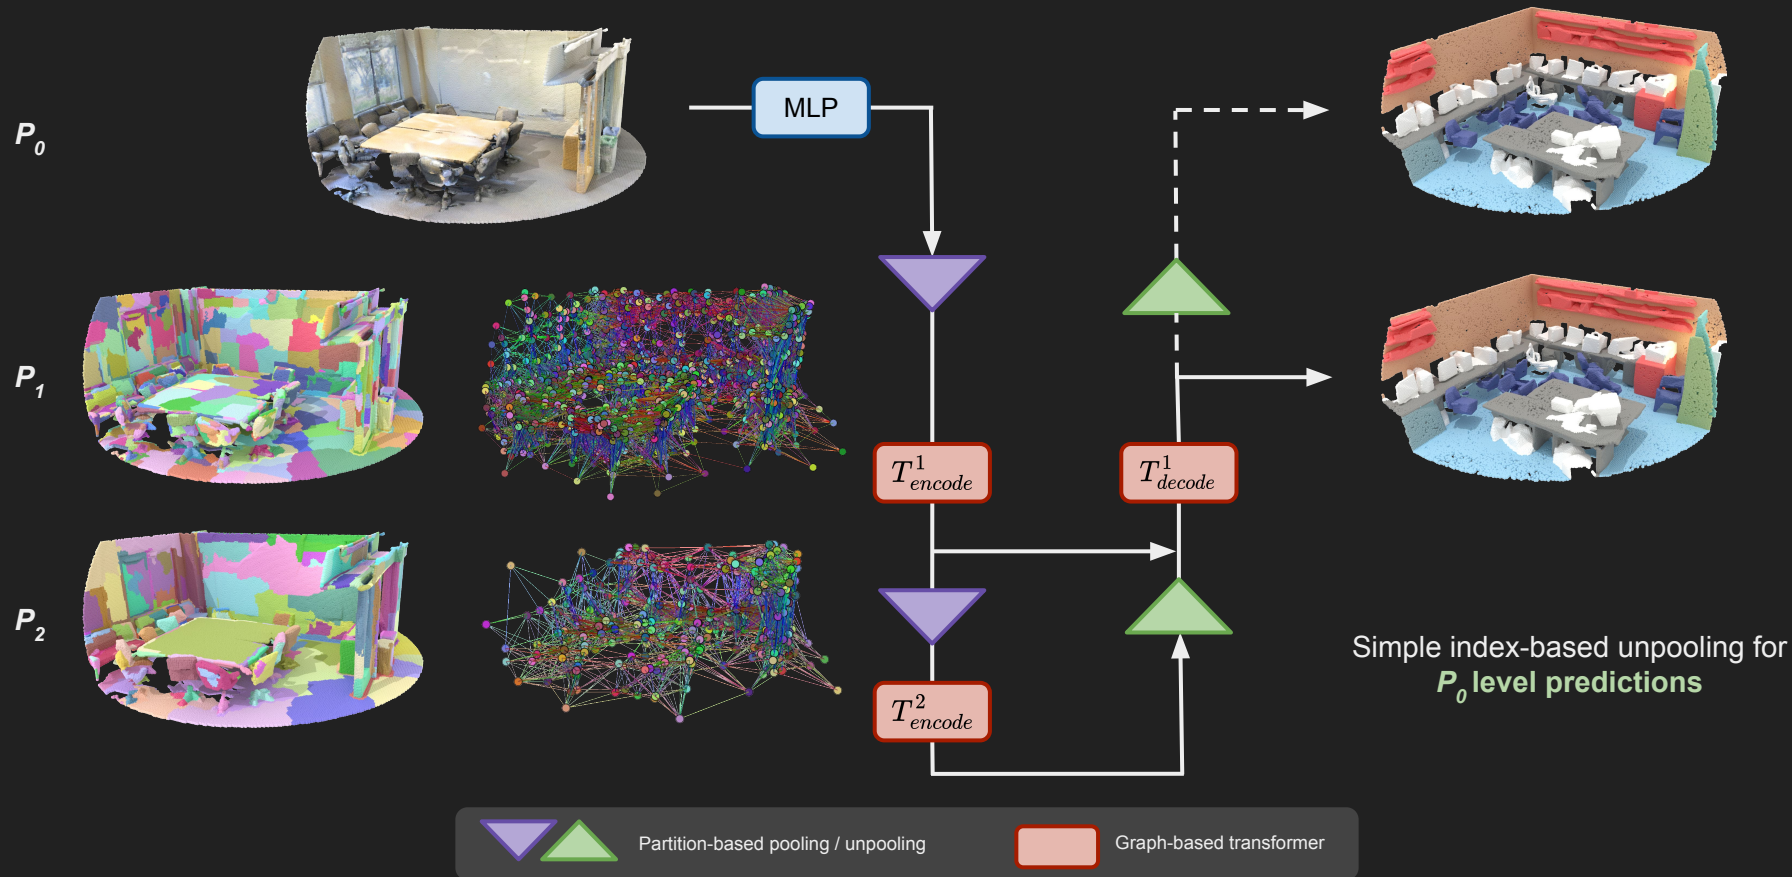



# Pipeline - Inference

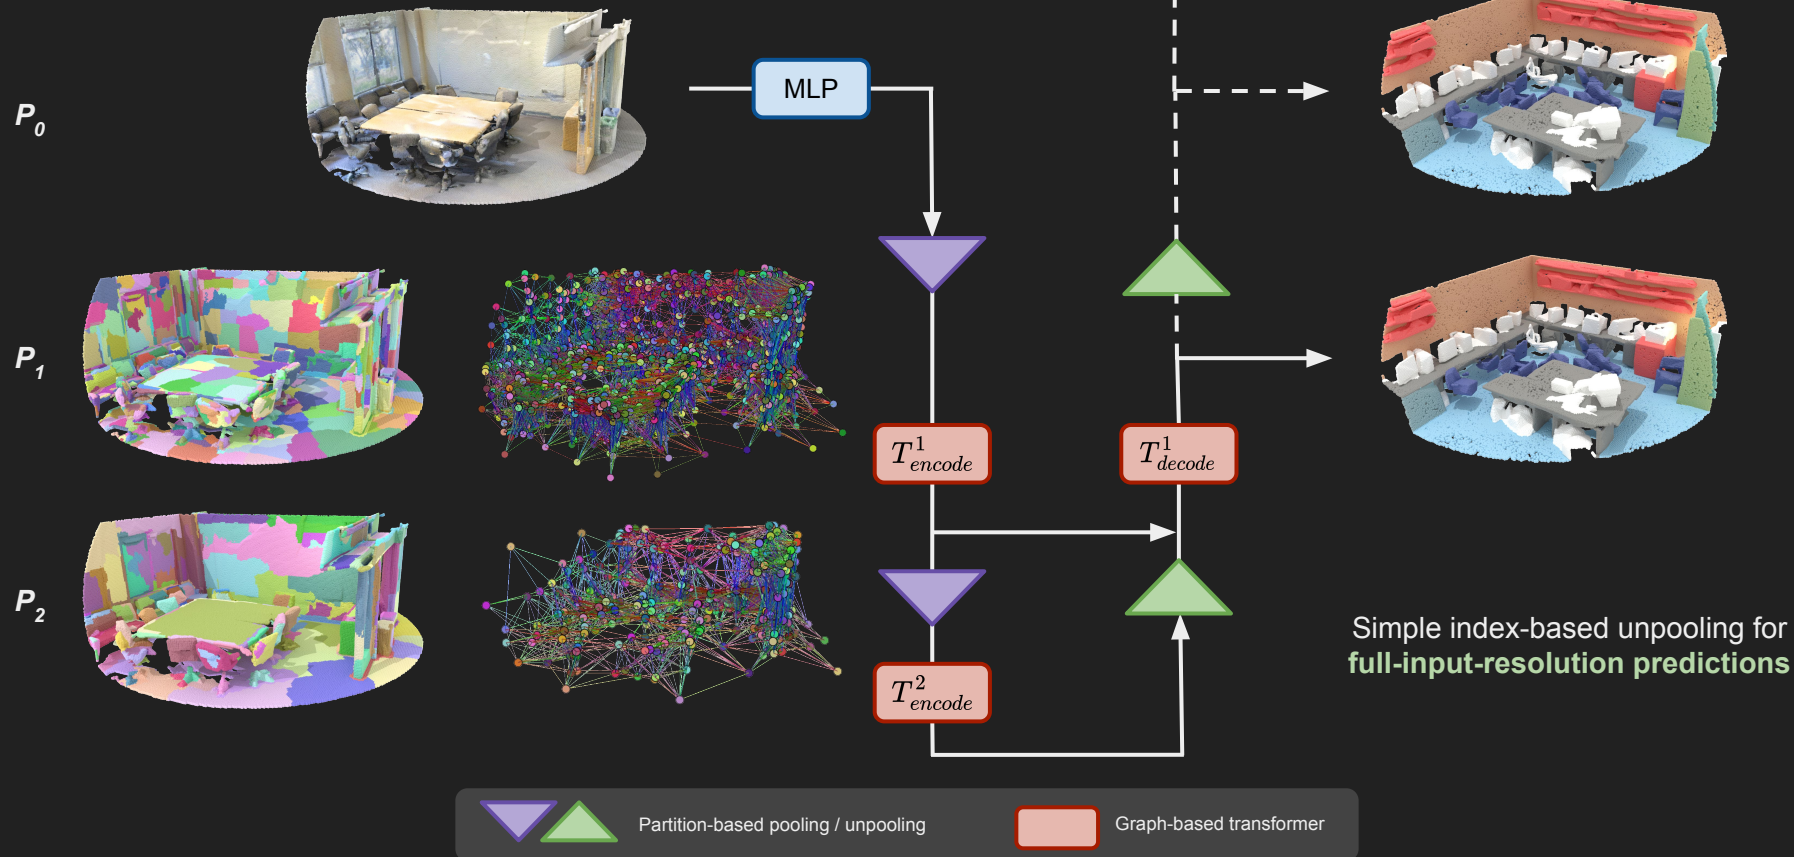

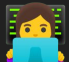

# Implementation details - **Project structure & dependencies**

Code structure

[lightning-hydra-template](#)

Dataset structure

[PyTorch\\_Geometric](#)

Data structures

[Data & NAG](#)

## **Before starting**

See [README](#) and [docs/](#)

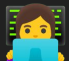

# Implementation details - Data transforms

|                                            |                                                    |
|--------------------------------------------|----------------------------------------------------|
| Voxelization                               | <a href="#"><code>GridSampling3D</code></a>        |
| Neighbor search                            | <a href="#"><code>KNN</code></a>                   |
| Elevation estimation                       | <a href="#"><code>GroundElevation</code></a>       |
| Pointwise local<br>geometric features      | <a href="#"><code>PointFeatures</code></a>         |
| Adjacency graph                            | <a href="#"><code>AdjacencyGraph</code></a>        |
| Hierarchical partition                     | <a href="#"><code>CutPursuitPartition</code></a>   |
| Superpoint-wise<br>handcrafted features    | <a href="#"><code>SegmentFeatures</code></a>       |
| Superpoint adjacency<br>graph and features | <a href="#"><code>RadiusHorizontalGraph</code></a> |

## `pre_transform`

only once at preprocessing time

|                                                    |                                                             |
|----------------------------------------------------|-------------------------------------------------------------|
| <b>Point /<br/>superpoint /<br/>edge sampling*</b> | <a href="#"><code>SampleSubNodes</code></a>                 |
|                                                    | <a href="#"><code>SampleRadiusSubgraphs</code></a>          |
|                                                    | <a href="#"><code>SampleSegments</code></a>                 |
|                                                    | <a href="#"><code>SampleEdges</code></a>                    |
|                                                    | <a href="#"><code>NAGRestrictSize</code></a>                |
| Superpoint graph<br>features                       | <a href="#"><code>OnTheFlyHorizontalEdgeFeatures</code></a> |
| Feature<br>augmentations                           | <a href="#"><code>NAGJitterKey</code></a>                   |
|                                                    | <a href="#"><code>NAGDropoutColumns</code></a>              |
|                                                    | <a href="#"><code>NAGDropoutRows</code></a>                 |

## `on_device_transform`

for each **train\*** / val / test batch on GPU

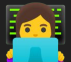

# Tutorial

GitHub repository

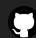

[drprojects/superpoint\\_transformer](https://github.com/drprojects/superpoint_transformer)

Tutorial notebook

[notebooks/superpoint\\_transformer\\_tutorial.ipynb](#)

# 🧐 Going further - **Panoptic segmentation with SuperCluster**

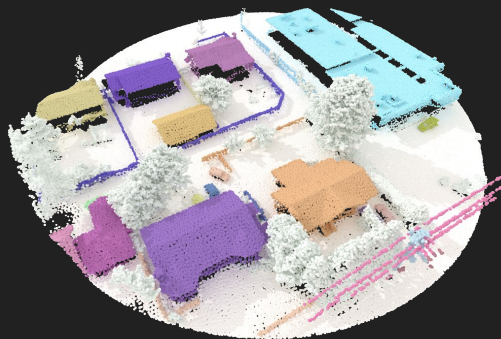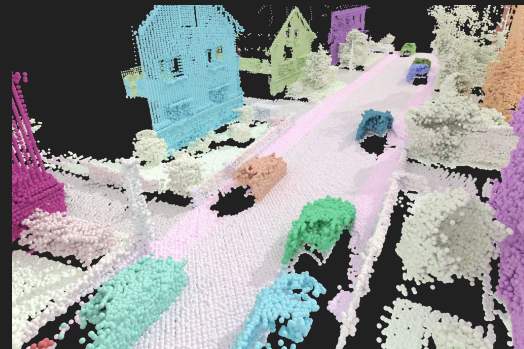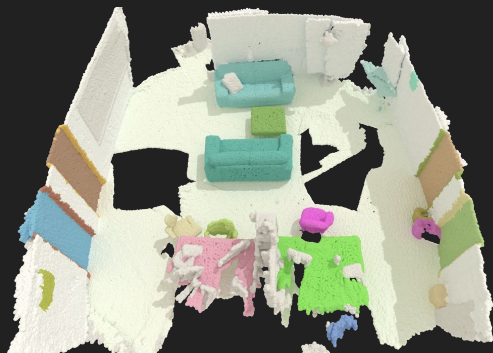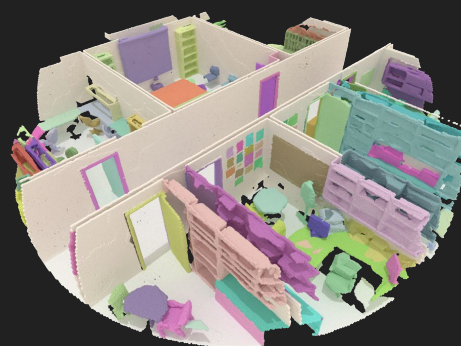

See [paper](#) (3DV'24 Oral)



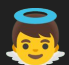

# Be an angel - Good practices for using SPT

If you use or simply ❤️ [superpoint\\_transformer](#)

Leave us a ★ on Github, it means a lot to us !

## Before opening an issue

Have you thoroughly read our [README](#), [docs/](#), and [notebooks/](#) ?

Have you looked at the documented code ?

Have you checked already-closed issues ?

Have you **truly investigated** the problem yourself beforehand ?

Have you modified the code (we only provide support for the code we released) ?

Are you using the latest version of the code ?

## Writing your issue

Explain your issue in detailed and **clear English**

Provide a **minimum reproducible example**

Provide the **entire error traceback**, if any

Make the most of Markdown to make your message for easily readable

**Do not email me for issues, use GitHub**

## Writing a PR

We would gladly accept PRs for bug fixes, new functionalities, new datasets, new models

# Discussion

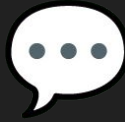

Supplement: supplementary_material [file superpoint_transformer_tutorial.pdf › supplementary/multi-floor-3d-code/skeleton_extraction/superpoint_transformer/media/superpoint_transformer_tutorial.pdf]
